# Supplementary material
Source: PubMed Central journal article supplement (PMC391059)

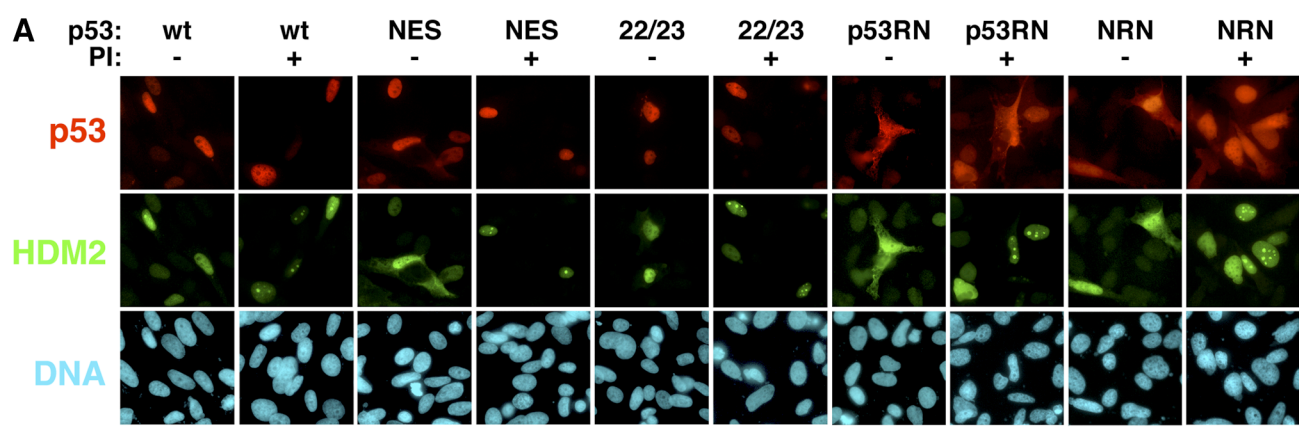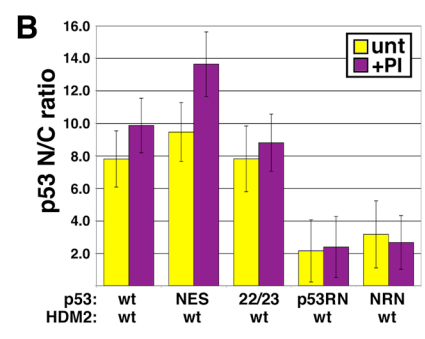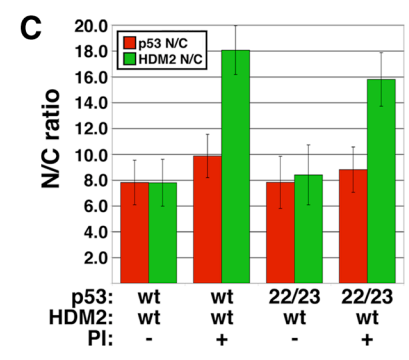

Supplement: 7600145s1.pdf [file 7600145s1.pdf]
